# Supplementary material for: Role of Oxidative Stress in Liver Disorders
Source: MDPI journal article supplement (doi:10.3390/livers2040023), 2022-10-14
Supplement: s1 [file s1]

**Table S1.** Antioxidant compounds under clinical trial for the treatment of liver disorders. Source: ClinicalTrials.gov (NIH). Only trials in “Recruiting”, “Enrolling by invitation”, “Active, not recruiting”, “Terminated” and “Completed” status are included.

| <i>Compound</i>                                                                                                         | <i>Mode of action</i>                                                                                                                                               | <i>Liver diseases (ClinicalTrials.gov Identifier)</i>                                        | <i>Other/Remarks</i>                                                                                                                                     |
|-------------------------------------------------------------------------------------------------------------------------|---------------------------------------------------------------------------------------------------------------------------------------------------------------------|----------------------------------------------------------------------------------------------|----------------------------------------------------------------------------------------------------------------------------------------------------------|
| <b>Melatonin</b><br><br>Endogenous neurohormone derived from tryptophan.                                                | Direct detoxification of ROS/RNS; indirect stimulation of antioxidant enzymes and inhibition of the activity of pro-oxidant enzymes; chelator of transition metals. | <b>Fibrosis:</b> NCT03091738                                                                 | Also known as N-acetyl-5-methoxytryptamine                                                                                                               |
| <b>Coenzyme Q10</b><br><br>Component of the electron transport chain that participates in aerobic cellular respiration. | Acts as an electron carrier and as a free-radical-scavenger                                                                                                         | <b>HCC:</b> NCT01964001                                                                      | Also known as ubiquinone                                                                                                                                 |
| <b>Lipoic acid</b><br><br>Naturally-occurring organosulfur compound with antioxidant properties.                        | Electron acceptor. Can recycle other oxidants such as glutathione and vitamins C and E.                                                                             | <b>NASH:</b> NCT01406704, NCT01650181<br><b>NAFLD:</b> NCT04475276, NCT01650181, NCT04308980 | Also known as thioctic acid                                                                                                                              |
| <b>Inosine</b><br><br>Nucleoside formed when hypoxanthine is attached to a ribose ring.                                 | Peroxynitrite-scavenger.<br>Inosine/Hypoxanthine conversion*.                                                                                                       | <b>NAFLD:</b> NCT02930161                                                                    | *Purine nucleoside phosphorylase intraconverts inosine and hypoxanthine, and hypoxanthine degradation produces ROS.                                      |
| <b>Tauroursodeoxycholic acid (TUDCA)</b><br><br>Ambiphilic bile acid                                                    | Upregulates the expression of antioxidant genes and increases generation of GSH.                                                                                    | <b>Cholestasis:</b> NCT00004410, NCT01829698, NCT01899703, NCT01857284                       | Other actions: inhibition of apoptosis, decrease of ER stress and protein aggregation, stabilization of mitochondrial membranes, and activation of Nrf2. |

|                                                                                                          |                                                                                               |                                                                                                                                                                                                     |                                                                                           |
|----------------------------------------------------------------------------------------------------------|-----------------------------------------------------------------------------------------------|-----------------------------------------------------------------------------------------------------------------------------------------------------------------------------------------------------|-------------------------------------------------------------------------------------------|
| <b>N-Acetylcysteine (NAC)</b><br>A synthetic N-acetyl derivative of the endogenous amino acid L-cysteine | Replenishment of glutathione, ROS scavenger, and protection against toxic metals.             | <b>ASH:</b> NCT00863785<br><b>NAFLD:</b> NCT04330326, NCT02117700<br><b>ALD:</b> NCT00962442, NCT00863785<br><b>DILI:</b> NCT02686385, NCT02182167, NCT03679442<br><br><b>Fibrosis:</b> NCT03759158 |                                                                                           |
| <b>Carotenoids</b><br>Yellow, orange, and red organic pigments produced mainly by plants                 | ROS scavenger                                                                                 | <b>Fibrosis:</b> NCT03659058                                                                                                                                                                        |                                                                                           |
| <b>Carnitine</b><br>Quaternary ammonium compound synthesized in the liver.                               | ROS scavenger, chelator, replenishment of antioxidant enzymes, and avoids lipid peroxidation. | <b>NAFLD:</b> NCT03319199, NCT04330326, NCT03439917                                                                                                                                                 | Transports long-chain fatty acids into mitochondria to be oxidized for energy production. |
| <b>Polyphenols</b><br>Naturally-occurring organic compounds characterized by multiples of phenol units.  | Electron donor                                                                                | <b>Fibrosis:</b> NCT05178303                                                                                                                                                                        | Include four principal classes: phenolic acids, flavonoids, stilbenes, and lignans.       |
| <b>Vitamin A</b><br>Fat-soluble vitamin                                                                  | Electron donor                                                                                | <b>NASH:</b> NCT02287779<br><b>Fibrosis:</b> NCT02227459                                                                                                                                            | Also known as retinol                                                                     |
| <b>Vitamin C</b><br>Essential nutrient that acts as a cofactor and potent water-soluble antioxidant.     | Electron donor                                                                                | <b>NAFLD:</b> NCT00862433<br><b>HCC:</b> NCT01754987, NCT04033107<br><b>Cholestasis:</b> NCT04787419<br><b>Fibrosis:</b> NCT00655018, NCT03659058                                                   | Also known as ascorbic acid                                                               |

|                                                                            |                                                                                                                     |                                                                                                                                                                                                                                                                                                                                                                                |                                                                                        |
|----------------------------------------------------------------------------|---------------------------------------------------------------------------------------------------------------------|--------------------------------------------------------------------------------------------------------------------------------------------------------------------------------------------------------------------------------------------------------------------------------------------------------------------------------------------------------------------------------|----------------------------------------------------------------------------------------|
| <b>Vitamin E</b><br><br>Fat-soluble antioxidant                            | Radical scavenger, delivering a hydrogen atom to free radicals.                                                     | <b>NASH:</b> NCT03988725, NCT04977661, NCT02962297, NCT03669133, NCT02581085, NCT00063622, NCT04193982, NCT01934777<br><br><b>NAFLD:</b> NCT00655018, NCT00862433, NCT02581085, NCT04193982, NCT02690792, NCT00063635, NCT01792115, NCT01147523, NCT03749070, NCT02369536<br><br><b>Cholestasis:</b> NCT02633384<br><br><b>Fibrosis:</b> NCT01935817, NCT03659058, NCT00119119 | Also known as tocopherol                                                               |
| <b>Resveratrol</b><br><br>Natural phenol produced in several plants        | ROS scavenger, promotes the activity of antioxidant enzymes and inhibits NADPH oxidase-mediated production of ROS.  | <b>NASH:</b> NCT02030977<br><br><b>NAFLD:</b> NCT01464801, NCT01446276, NCT02216552, NCT02030977                                                                                                                                                                                                                                                                               | Antioxidant ability depends on the redox properties of their phenolic hydroxyl groups. |
| <b>Selenium</b>                                                            | Component of the antioxidant enzymes (Gpx, Trx)                                                                     | <b>NASH:</b> NCT01650181, NCT04308980<br><b>NAFLD:</b> NCT0484063, NCT04308980, NCT01650181<br><br><b>HCC:</b> NCT01355107<br><b>Fibrosis:</b> NCT00271245, NCT00212186                                                                                                                                                                                                        |                                                                                        |
| <b>Curcumin</b><br><br>Natural yellow pigment produced in turmeric plants. | ROS scavenger, modulates the activity of GSH, catalase, and SOD enzymes and inhibits ROS-generating enzymes.        | <b>NAFLD:</b> NCT04315350, NCT02369536, NCT02908152, NCT04315350, NCT03864783                                                                                                                                                                                                                                                                                                  |                                                                                        |
| <b>MitoQ</b><br><br>Engineered mitochondria-targeted antioxidant           | Continuously recycled to the active ubiquinol antioxidant by complex II of the respiratory chain, similar to CoQ10. | <b>NAFLD:</b> NCT01167088                                                                                                                                                                                                                                                                                                                                                      | Ubiquinone moiety linked to a lipophilic triphenylphosphonium (TPP) cation.            |

\* **ALD:** alcoholic liver disease; **ASH:** alcoholic steatohepatitis; **DILI:** drug-induced liver injury; **HCC:** hepatocellular carcinoma; **NAFLD:** non-alcoholic liver disease; **NASH:** non-alcoholic steatohepatitis.
