# Supplementary material for: Role of Oxidative Stress in Liver Disorders
Source: MDPI journal article supplement (doi:10.3390/livers2040023), 2022-10-14
Supplement: s1 [file s1]

Archive with 1 entries (1 files):
- livers-1906214-supplementary.pdf
